# Supplementary material for: Chitosan hydrogelation with a phenothiazine based aldehyde: a synthetic approach toward highly luminescent biomaterials
Source: Royal Society of Chemistry journal article supplement (doi:10.1039/c7py01678f), 2017-11-16
Supplement: c7py01678f1.pdf [file c7py01678f1.pdf]

## Chitosan Hydrogelation with a Phenothiazine based Aldehyde – a Synthetic Approach toward Highly Luminescent Biomaterials

Andrei Bejan<sup>1</sup>, Daniela Ailincăi<sup>1</sup>, Bogdan C. Simionescu<sup>1,2</sup>, Luminita Marin<sup>1\*</sup>

<sup>1</sup> "Petru Poni" Institute of Macromolecular Chemistry, Romanian Academy, 700487 Iasi, Romania

<sup>2</sup> Department of Natural and Synthetic Polymers, "Gh. Asachi" Technical University, 700050 Iasi, Romania

\*email: [lmartin@icmpp.ro](mailto:lmartin@icmpp.ro)

### Acknowledgements

This publication is part of a project that has received funding from Romanian National Authority for Scientific Research, MEN – UEFISCDI grant, project number PN-II-RU-TE-2014-4-2314 and European Union's Horizon 2020 research and innovation programme under grant agreement 667387.

The authors are thankful to Professor Mihai Barboiu, Institut Européen des Membranes, Montpellier, France for useful discussions related to the reversible formation of the imine linkages on chitosan.

To calculate the NH<sub>2</sub>/CHO molar ratio, the number of moles of glucosamine units into the chitosan has been calculated taking into consideration the degree of deacetylation, using the

$$\text{equation } N = \frac{m}{0.83 \times 162 + 0.17 \times 204} \times 0.83 \quad (\text{eq. 1})$$

where N: number of the glucosamine moles; m: amount of chitosan used in reaction; 0.83: fraction of glucosamine units; 162: molecular weight of the glucosamine unit; 0.17: fraction of N-acetylglucosamine units; 204: molecular weight of the N-acetylglucosamine unit.

To have an insight on the amount of aldehyde transformed into imine bonds during the hydrogelation process, the conversion has been calculated with equation:

$$\eta\% (\underline{\text{CHO}} \rightarrow \underline{\text{CH=N}}) = \frac{M_i - M_r}{M_i} \times 100 \text{ (eq. 2),}$$

where  $M_i$  is the amount of aldehyde used for hydrogel obtaining, and  $M_r$  represents the amount of aldehyde removed during the hydrogels washing, found as the difference between the initial amount of reagents (chitosan and aldehyde) and the amount of xerogel. This calculation supposed the total removal of the aldehyde during the washing and lyophilization processes.

Taking into consideration the conversion of the aldehyde into imine units, the conversion of the amine units into imine units has been calculated with the equation:

$$\eta\% (\text{NH}_2 \rightarrow \text{CH=N}) = \frac{\eta\% (\text{CHO} \rightarrow \text{CH=N})}{100 \times n\text{NH}_2} \times 100 \text{ (eq. 3),}$$

where  $n\text{NH}_2$  is the number of glucosamine moles from the  $\text{NH}_2/\text{CHO}$  molar ratio used for hydrogel obtaining.

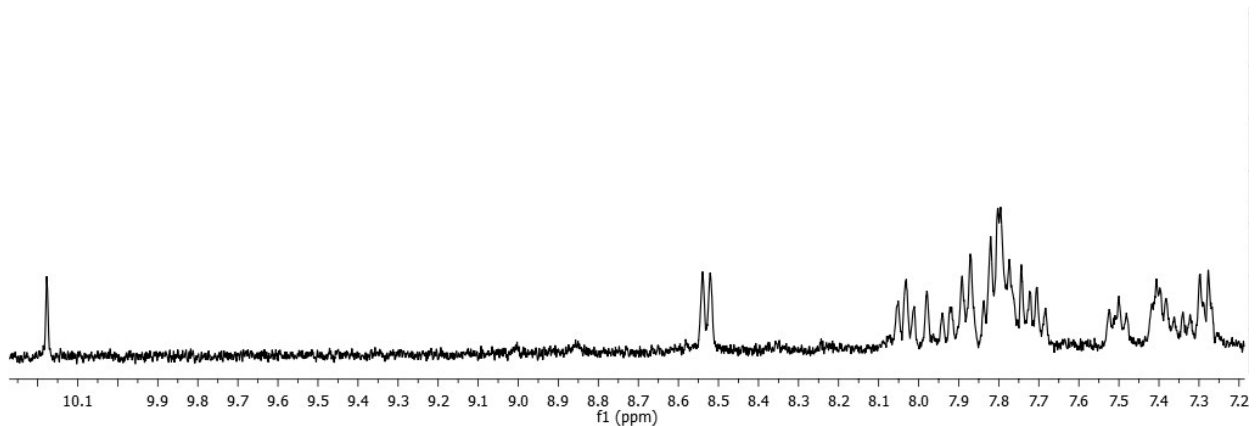

**Figure 1s.**  $^1\text{H}$ -NMR spectrum of the **CPA1** hydrogel

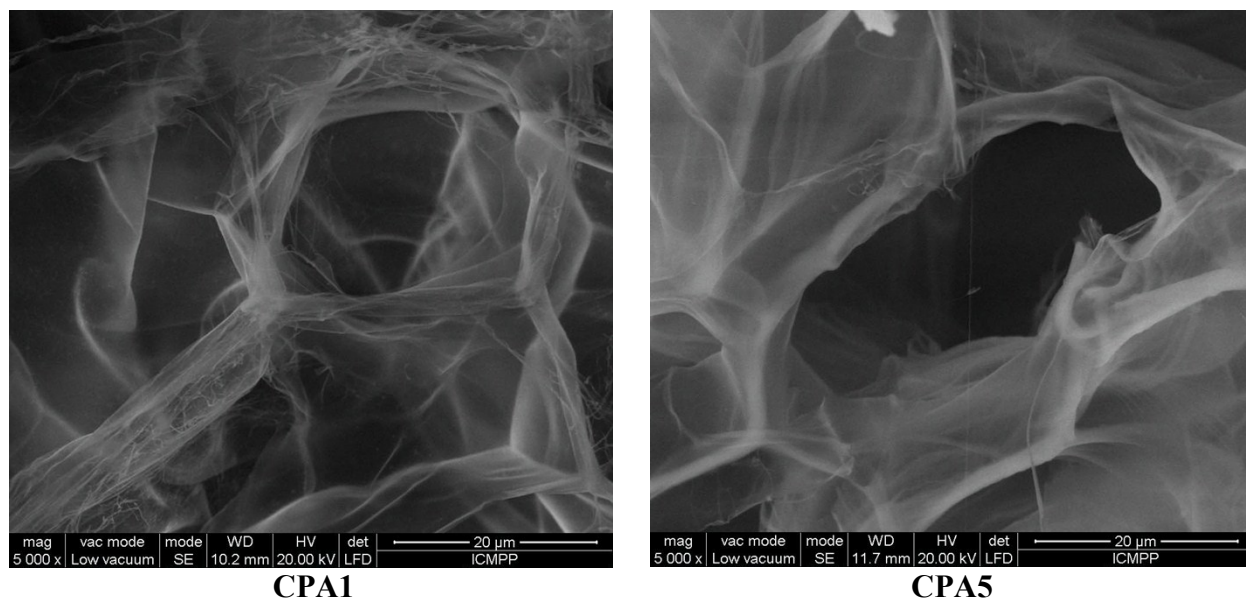

**Figure 2s.** SEM images of the xerogels

**Table 1s.** Stoks shift of the hydrogels calculated for the three absorption maxima

| Code | $\lambda_{\text{abs1}}$<br>(nm) | $\lambda_{\text{em1}}$<br>(nm) | Stokes<br>shift 1<br>(nm) | $\lambda_{\text{abs2}}$<br>(nm) | $\lambda_{\text{em2}}$<br>(nm) | Stokes<br>shift 2<br>(nm) | $\lambda_{\text{abs3}}$<br>(nm) | $\lambda_{\text{em3}}$<br>(nm) | Stokes<br>shift 3<br>(nm) |
|------|---------------------------------|--------------------------------|---------------------------|---------------------------------|--------------------------------|---------------------------|---------------------------------|--------------------------------|---------------------------|
| CPA1 | 360                             | 523                            | 163                       | 395                             | 529                            | 134                       | 481                             | 529                            | 48                        |
| CPA2 | 360                             | 522                            | 162                       | 393                             | 529                            | 136                       | 487                             | 527                            | 40                        |
| CPA3 | 360                             | 523                            | 163                       | 395                             | 525                            | 130                       | 484                             | 533                            | 49                        |
| CPA4 | 360                             | 524                            | 164                       | 390                             | 531                            | 141                       | 480                             | 529                            | 49                        |
| CPA5 | 360                             | 524                            | 164                       | 406                             | 532                            | 126                       | 479                             | 537                            | 58                        |

**Table 2s.** Stoks shift of the xerogels calculated for the three absorption maxima

| Code | $\lambda_{\text{abs1}}$<br>(nm) | $\lambda_{\text{em1}}$<br>(nm) | Stokes<br>shift 1<br>(nm) | $\lambda_{\text{abs2}}$<br>(nm) | $\lambda_{\text{em2}}$<br>(nm) | Stokes<br>shift 2<br>(nm) | $\lambda_{\text{abs3}}$<br>(nm) | $\lambda_{\text{em3}}$<br>(nm) | Stokes<br>shift 3<br>(nm) |
|------|---------------------------------|--------------------------------|---------------------------|---------------------------------|--------------------------------|---------------------------|---------------------------------|--------------------------------|---------------------------|
| CPA1 | 360                             | 515                            | 155                       | 395                             | 513                            | 118                       | 481                             | 551                            | 70                        |
| CPA2 | 360                             | 533                            | 173                       | 393                             | 508                            | 115                       | 487                             | 543                            | 56                        |
| CPA3 | 360                             | 500                            | 140                       | 395                             | 535                            | 140                       | 484                             | 540                            | 56                        |
| CPA4 | 360                             | 542                            | 192                       | 390                             | 538                            | 148                       | 480                             | 529                            | 49                        |

|             |     |     |            |     |     |            |     |     |           |
|-------------|-----|-----|------------|-----|-----|------------|-----|-----|-----------|
| <b>CPA5</b> | 360 | 545 | <b>185</b> | 406 | 544 | <b>138</b> | 479 | 539 | <b>60</b> |
|-------------|-----|-----|------------|-----|-----|------------|-----|-----|-----------|
